# Supplementary material for: Multifunctional scavengers in an MOF-Al2O3-based Janus separator for high-voltage lithium batteries
Source: Royal Society of Chemistry journal article supplement (doi:10.1039/d5eb00017c), 2025-01-01
Supplement: d5eb00017c1.pdf [file d5eb00017c1.pdf]

## **Scavenging Multifunction in MOF-Al<sub>2</sub>O<sub>3</sub>-based Janus separator for high-voltage Lithium batteries**

S. Davino<sup>1</sup>, P. Mustarelli<sup>2,3</sup>, D. Callegari<sup>1,2 \*</sup> and E. Quartarone<sup>1, 2</sup>

<sup>1</sup>*Department of Chemistry, University of Pavia, Via Taramelli 12, Pavia 27100, Italy*

<sup>2</sup>*GISEL Centro di Riferimento Nazionale per i Sistemi di Accumulo Elettrochimico di Energia,  
INSTM, Firenze 50121, Italy*

<sup>3</sup>*Dept. of Materials Science, University of Milano Bicocca, Via Cozzi 55, Milano 20125, Italy*

*\*Corresponding author: [daniele.callegari@unipv.it](mailto:daniele.callegari@unipv.it)*

### **Supplemental Information**

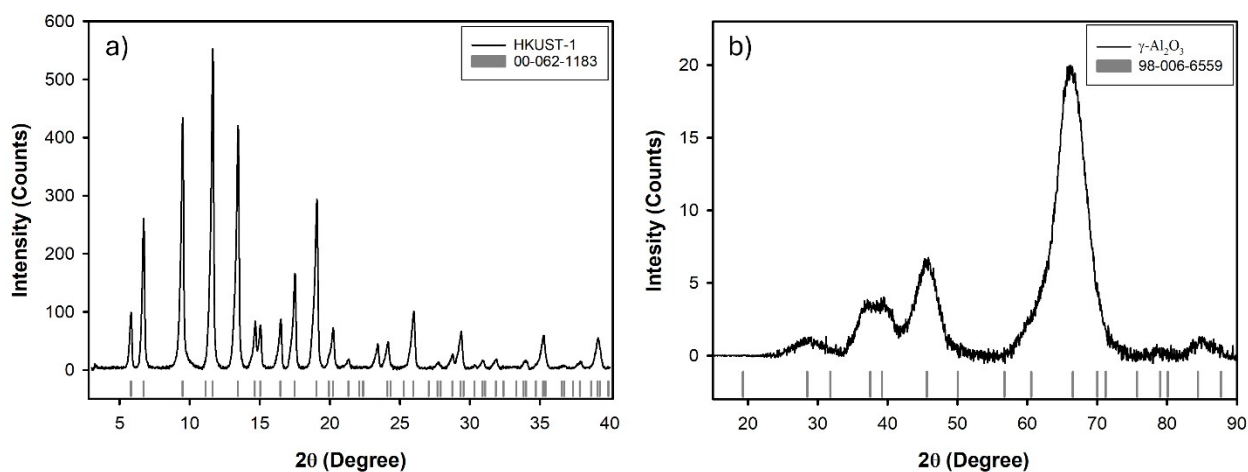

Figure S1. XRD pattern of a) HKUST-1 and b) Alumina nanoparticles.

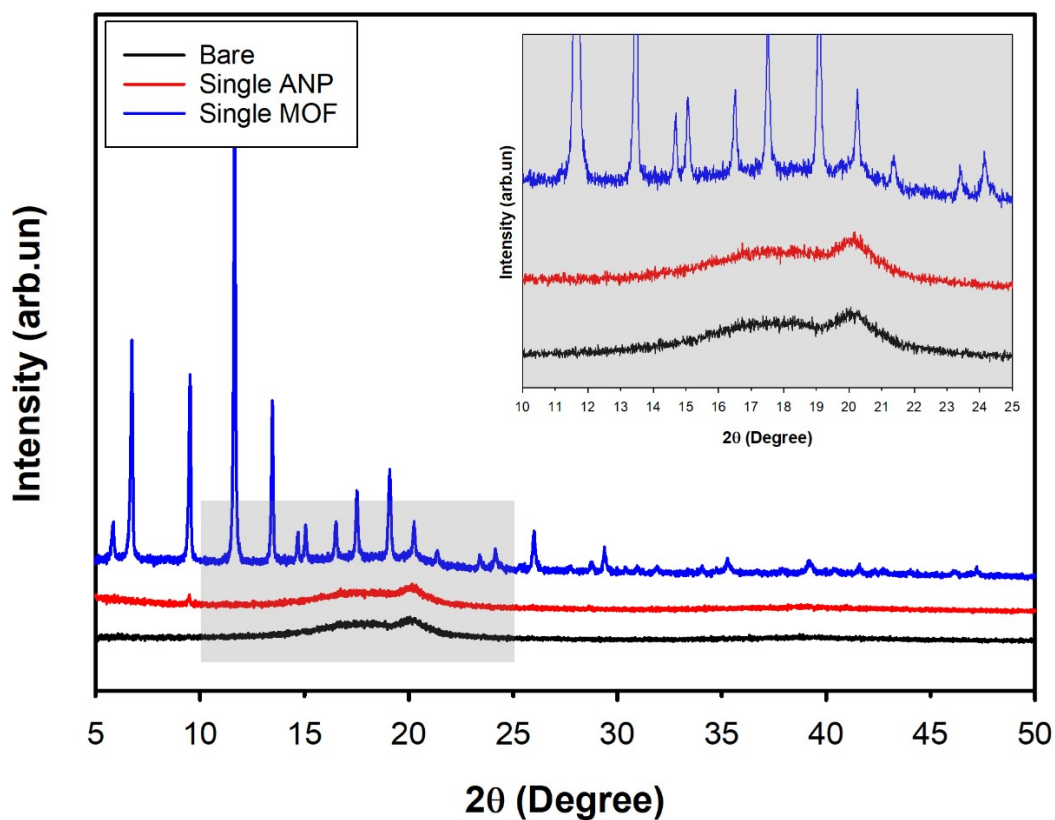

Figure S2. XRD pattern of Bare (black line), Single ANP (red line) and Single MOF (blue line) separator.

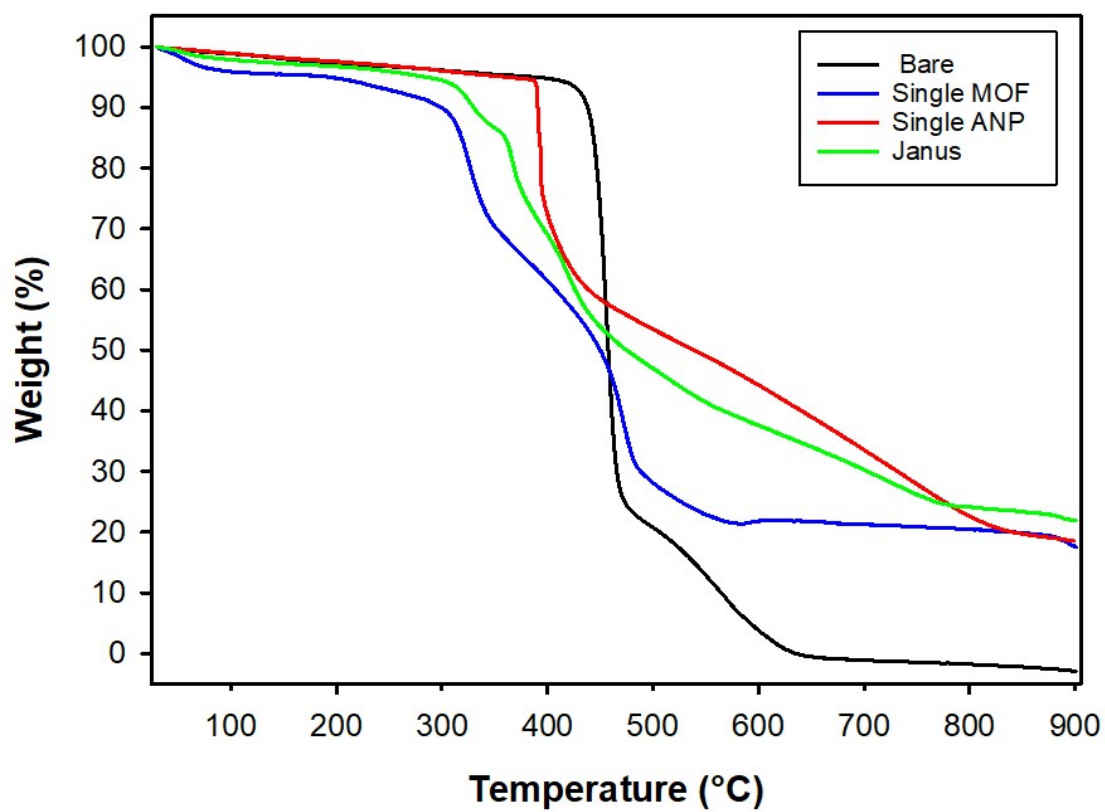

Figure S3. TGA curves of the investigated separators.

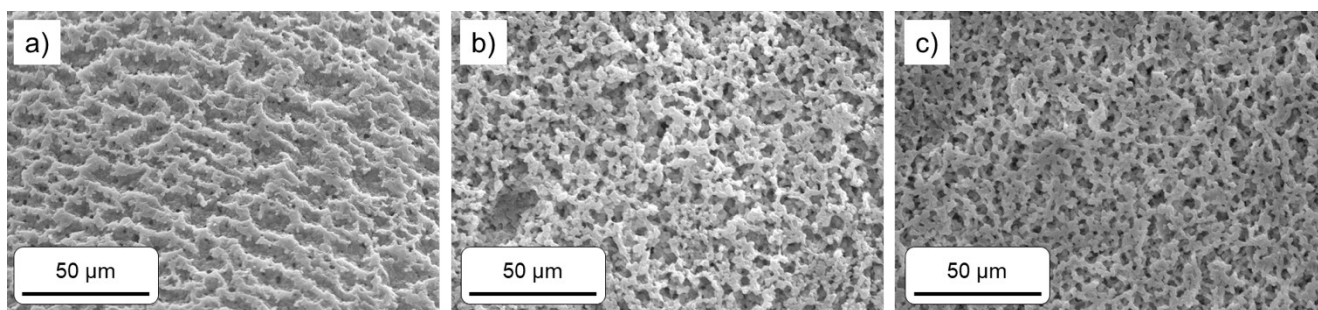

Figure S4. Top-view SEM images of a) Bare PVDF-HFP, b) Single MOF and c) Single ANP separators.

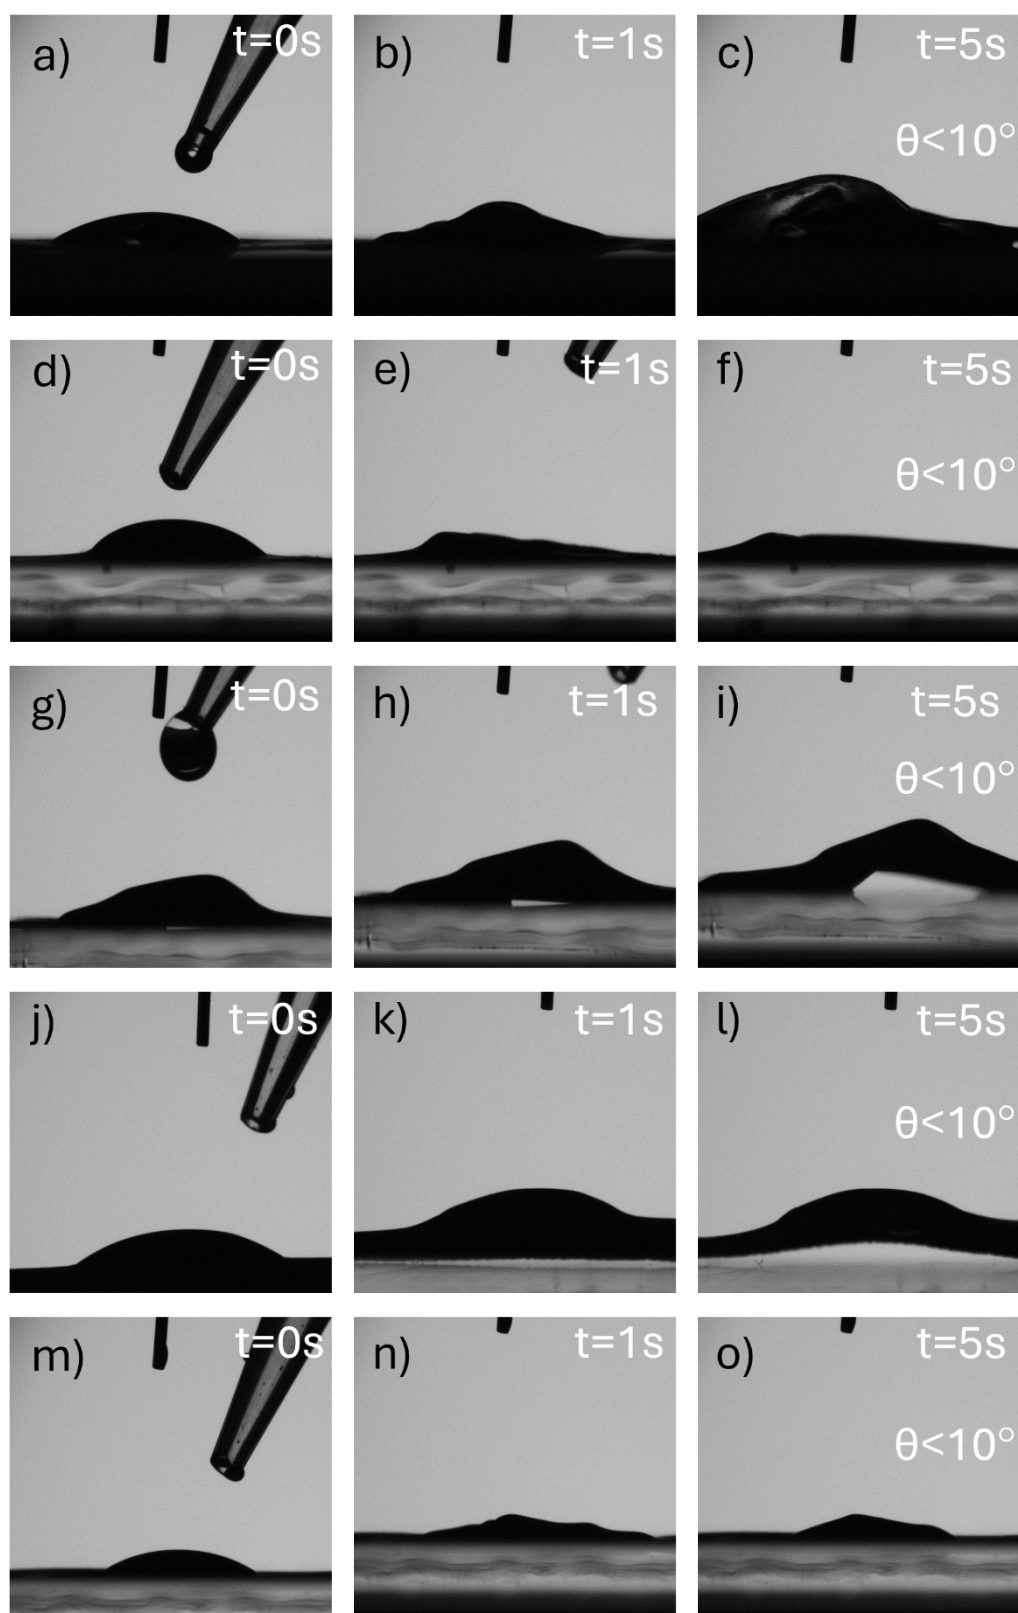

Figure S5. Contact angle test with LP30 electrolyte at different times of a-c) Bare separator, d-f) Single ANP separator, g-i) Single MOF separator, j-l) MOF layer of Janus separator and m-o) ANP layer of Janus Separator. All the tests recorded a contact angle  $< 10^\circ$

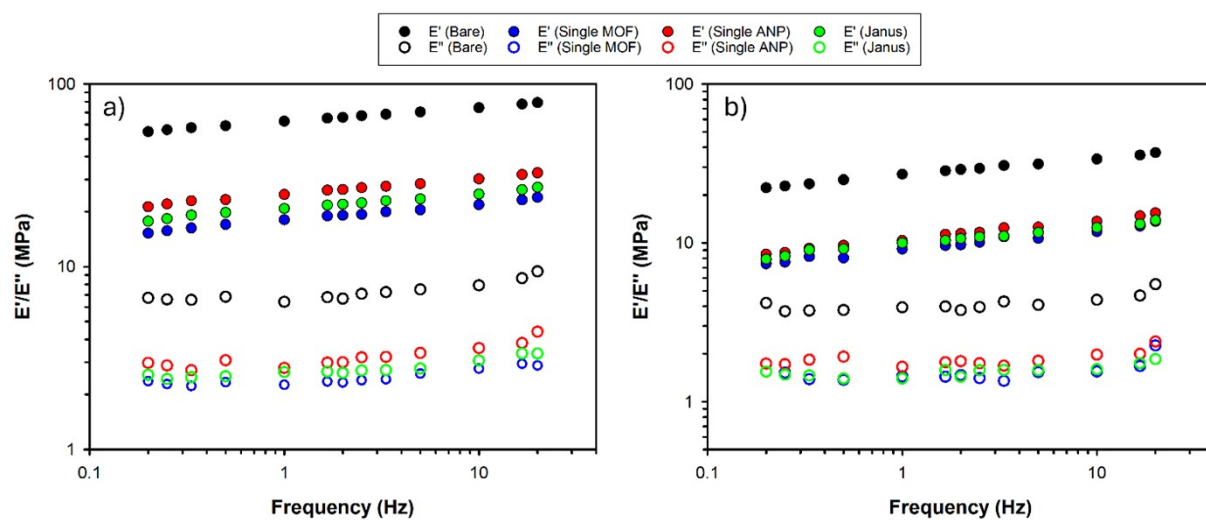

Figure S6. Frequency-sweep plots of the investigated separators a) at 50°C and b) 70°C.

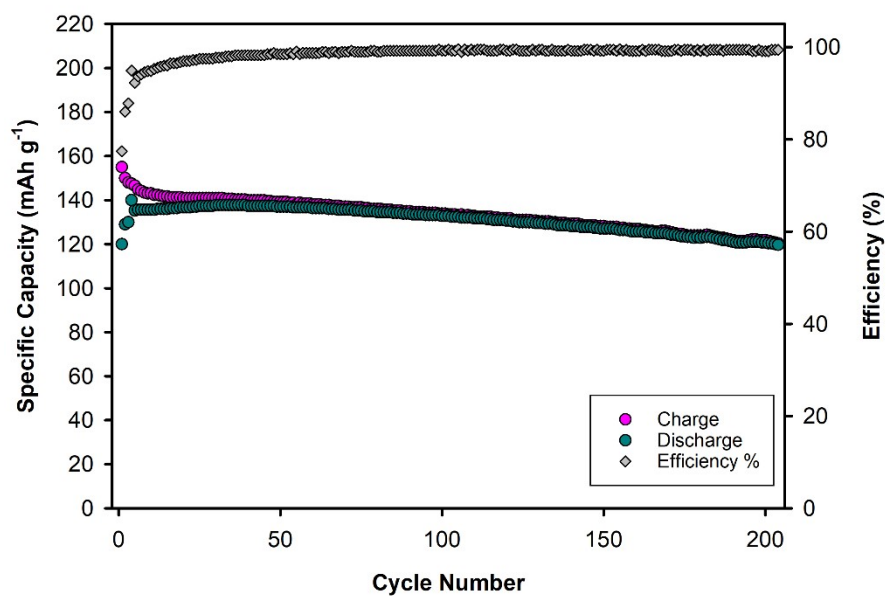

Figure S7. Charge and discharge capacity at 1C of galvanostatically cycled LNMO|Li coin cell with Janus separator with anhydrous electrolyte

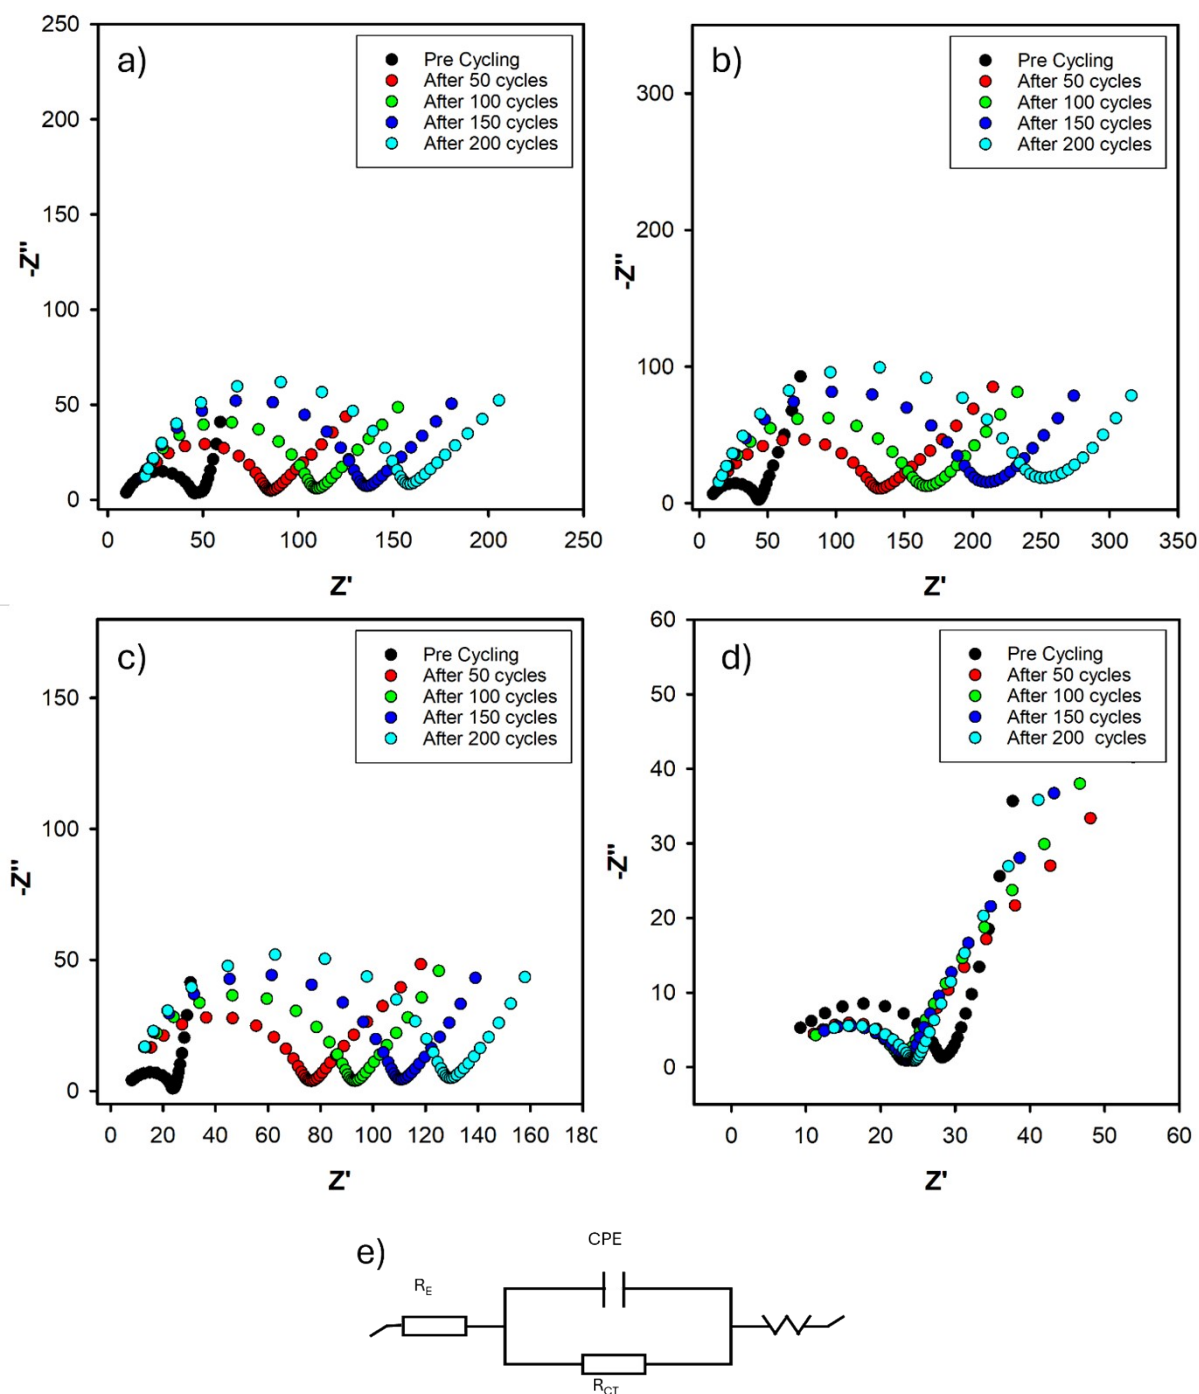

Figure S8. Nyquist plots of the LNMO|Li cells during the GCPL analysis with water enriched electrolyte with a) Bare, b) Single MOF, c) Single ANP, d) Janus separators. e) Schematic representation of the equivalent circuit used to fit the impedance spectra.

| Samples | Spinel $a/\text{\AA}$ | Unit cell volume/ $\text{\AA}^3$ |
|---------|-----------------------|----------------------------------|
|---------|-----------------------|----------------------------------|

|            |          |          |
|------------|----------|----------|
| OCV        | 8.166(1) | 544.5(2) |
| Bare       | 8.157(4) | 542.7(8) |
| Single MOF | 8.163(1) | 543.9(2) |
| Single ANP | 8.167(2) | 544.7(4) |
| Janus      | 8.164(2) | 544.1(4) |

*Table S1: Cell parameters computed for LNMO cathodes before and after 200 cycles at 1C with water-enriched electrolyte.*
